# Supplementary material
Source: Research Square preprint supplement (doi:10.21203/rs.3.rs-9162489/v1)
Supplement: Supplementary file 1 [file 42908aed4f7d4c64356f9457.docx]

Supplementary Table S1. Classification of Traits Evaluated in Igenity Beef

| **Category** | **Trait** | **Description** | **Interpretation / Ranges** |
| --- | --- | --- | --- |
| **Maternal Traits** | Birth Weight (BW) | Indicator of dystocia risk. | <30 kg = Good (1–3)30–35 kg = Normal (4–7)>35 kg = Poor (8–10) |
| Direct Calving Ease (CED) | Probability of being born without assistance. | ≤ –2 = Excellent (8–10)–2 to 0 = Normal (4–7)>0 = Deficient (1–3) |
| Maternal Calving Ease (CEM) | Ability of daughters to calve easily. | <80% = Poor (1–3)80–90% = Normal (4–7)>90% = Good (8–10) |
| Heifer Pregnancy Rate (HPR) | Early reproductive capacity. | <5 calves = Low (1–3)5–8 calves = Normal (4–7)>8 calves = High (8–10) |
| Milk Production (MILK) | Estimate of maternal milk efficiency. | <10 kg = Low (1–3)10–15 kg = Normal (4–7)>15 kg = High (8–10) |
| Stayability (STAY) | Productive longevity of the female. | <70% = Poor (1–3)70–80% = Normal (4–7)>80% = Good (8–10) |
| Docility (DOC) | Animal temperament. | Docile (1–3)Moderately docile (4–7)Aggressive (8–10) |
| **Production Traits** | Weaning Weight (WW) | Early growth until weaning. | <150 kg = Low (1–3)150–200 kg = Normal (4–7)>200 kg = High (8–10) |
| Average Daily Gain (ADG) | Daily growth efficiency. | <0.5 kg = Low0.5–1.0 kg = Normal>1.0 kg = High |
| Yearling Weight (YW) | Performance at one year of age. | <300 kg = Low300–400 kg = Normal>400 kg = High |
| Residual Feed Intake (RFI) | Feed efficiency. | < –0.5 = Excellent–0.5 to 0 = Normal>0 = Deficient |
| Scrotal Circumference (SC) | Indicator of male fertility. | <30 cm = Deficient30–34 cm = Normal>34 cm = Excellent |
| **Carcass Traits** | Marbling (MARB) | Intramuscular fat, meat quality. | <4 = Low4–6 = Normal>6 = Ideal |
| Ribeye Area (REA) | Muscular yield. | <50 cm² = Low50–70 cm² = Normal>70 cm² = Ideal |
| Fat Thickness (FAT) | Dorsal fat cover. | <10% = Low10–15% = Normal>15% = Ideal |
| Tenderness (TEND) | Meat tenderness. | < –1 = Low–1 to 0 = Normal>0 = Excellent |
| Hot Carcass Weight (HCW) | Usable weight after slaughter. | <250 kg = Low250–350 kg = Normal>350 kg = Ideal |
| **Overall Index** | Igenity Rank | Overall genetic performance index. | Top 25%MaternalTerminalBottom 25% |

Supplementary Table S2. Classification of Traits Evaluated in Igenity Basic

| **Category** | **Trait** | **Definition** | **Score / Interpretation** |
| --- | --- | --- | --- |
| **Health** | Productive Life (PL) | Productive longevity of the animal as a dairy cow (additional months of productive life). | Low (1–3), Average (4–7), High (8–10) |
| Fertility | Pregnancy rate of daughters every 21 days after calving. | Low (1–3), Average (4–7), High (8–10) |
| Somatic Cell Count (SCC) | Propensity to develop mastitis; lower values are favorable. | Low (1–3), Average (4–7), High (8–10) |
| Dairy Form | Physical expression of desirable traits in dairy cows. | Low (1–3), Average (4–7), High (8–10) |
| **Production Traits** | Milk Yield | Milk production in a standard 305-day lactation. | Low (1–3), Average (4–7), High (8–10) |
| Fat Yield | Amount of fat produced during lactation. | Low (1–3), Average (4–7), High (8–10) |
| Fat Percentage (Fat %) | Percentage of fat in milk. | Low (1–3), Average (4–7), High (8–10) |
| Protein Yield | Amount of protein produced in a 305-day lactation. | Low (1–3), Average (4–7), High (8–10) |
| Protein Percentage (Protein %) | Percentage of protein in milk. | Low (1–3), Average (4–7), High (8–10) |
| **Genetic Conditions** | Kappa Casein | Genotype associated with cheese-making yield. | BB optimalAB/BE intermediateAA/AE/EE less favorable |
| Beta Casein AB | Influence on cheese-making properties. | BB optimalAB/BE intermediateAA less favorable |
| Beta Lactoglobulin (Beta Lac.) | Whey protein affecting cheese yield. | BB optimalAB intermediateAA less favorable |
| Bovine Leukocyte Adhesion Deficiency (BLAD) | Detects animals that are free, carriers, or affected by an immunological disease. | T (Free)C (Carrier)A (Affected) |
| Deficiency of Uridine Monophosphate Synthase (DUMPS) | Detects carriers or free animals of a defect causing embryonic mortality. | T (Free)C (Carrier)A (Affected) |
