# Supplementary material
Source: Research Square preprint supplement (doi:10.21203/rs.3.rs-9162489/v1)
Supplement: Supplementary file 2 [file f744e8c19265e2ca4da033be.docx]

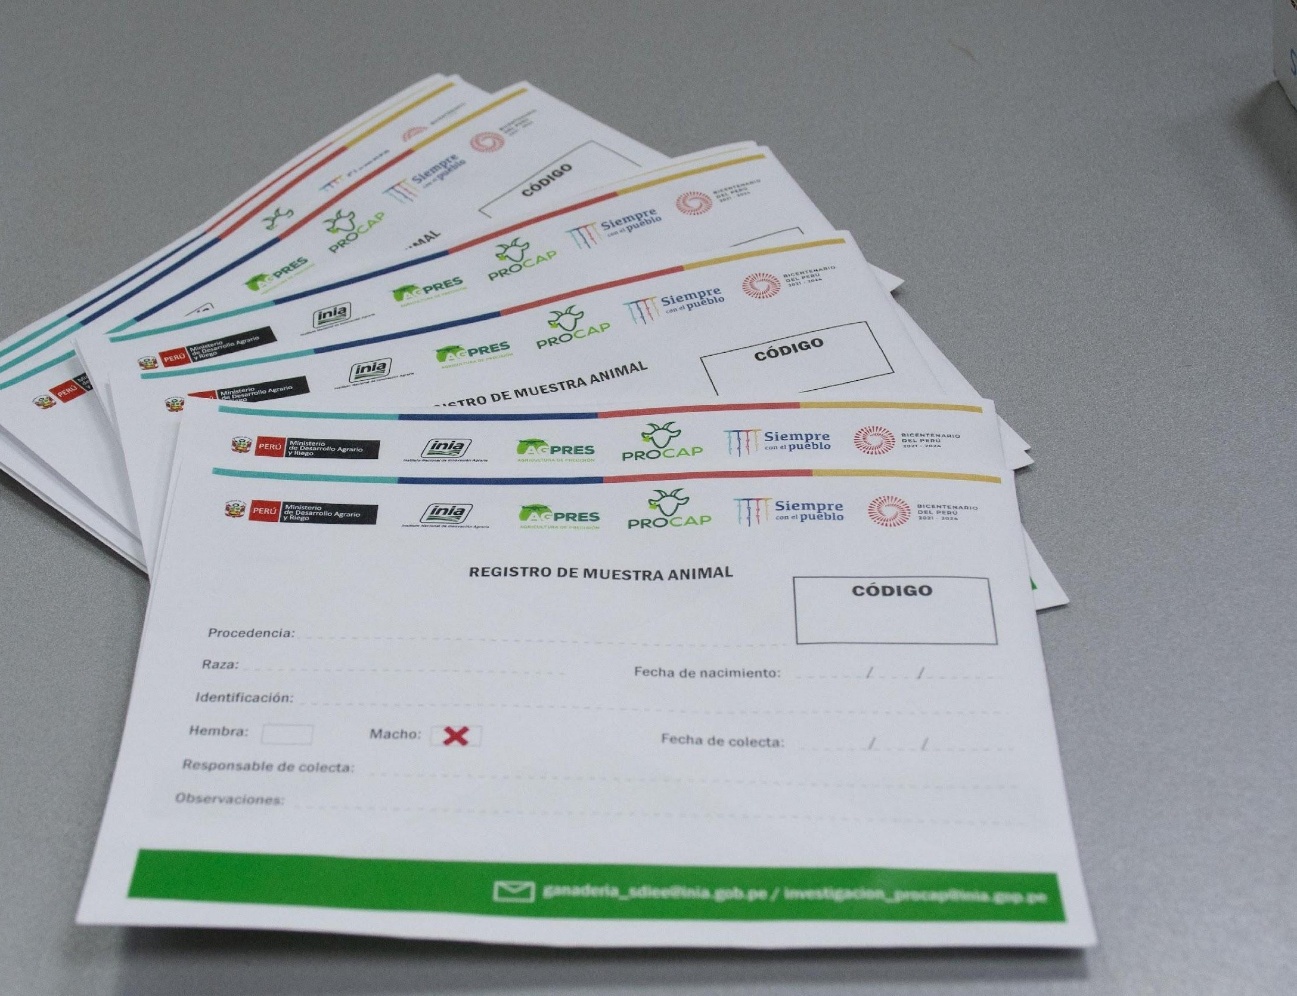


Supplementary Figure S1. Field sample labeling format used during collection.

Supplementary Figure S2. Representation of the Multiple Correspondence Analysis (MCA) of 60 Cattle – Igenity Beef

**
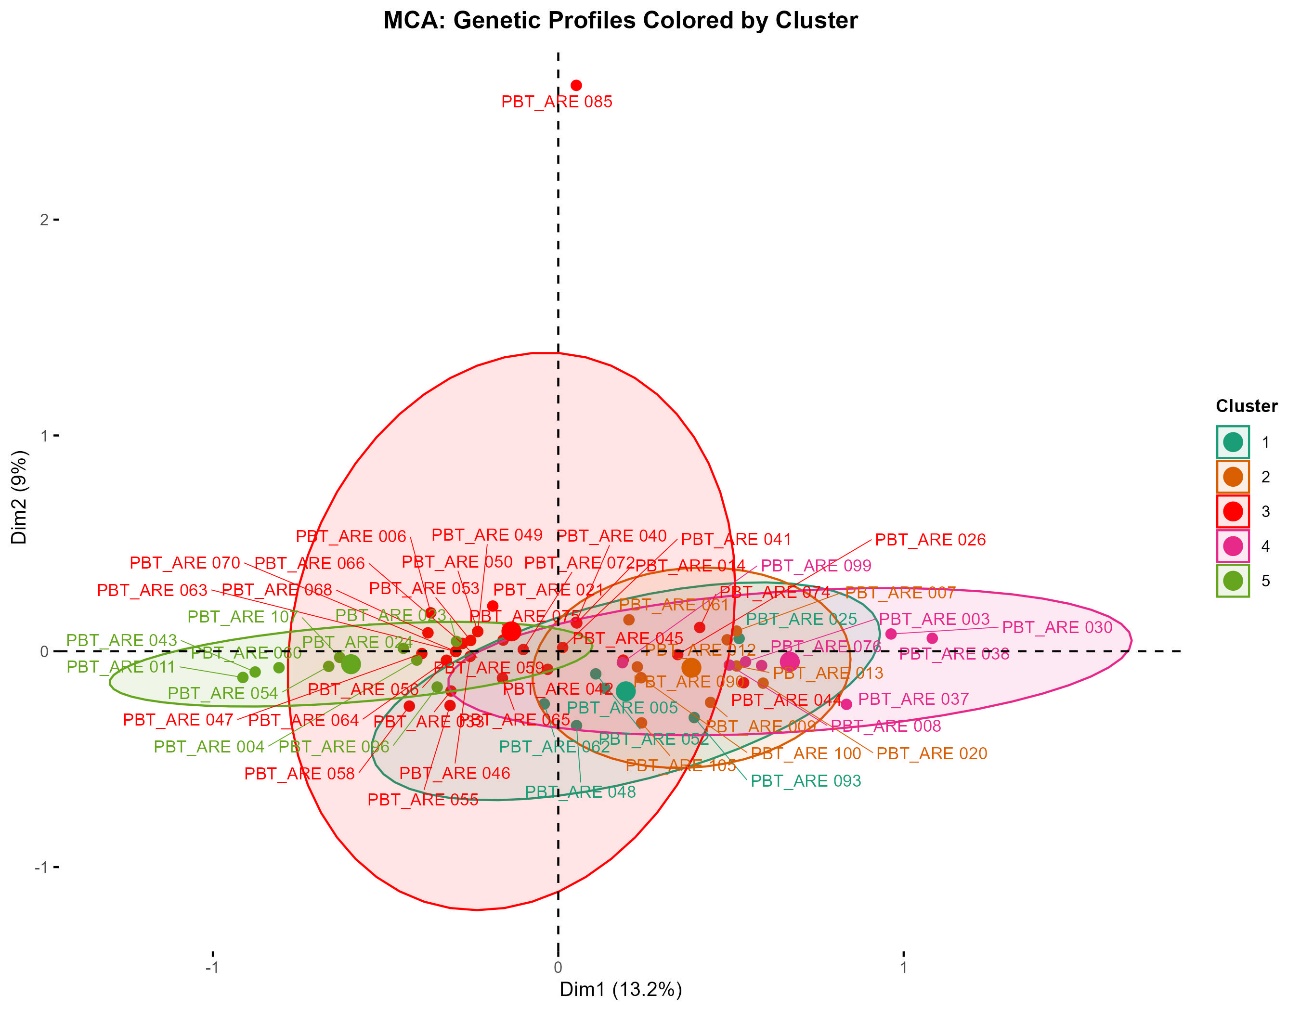
**

**
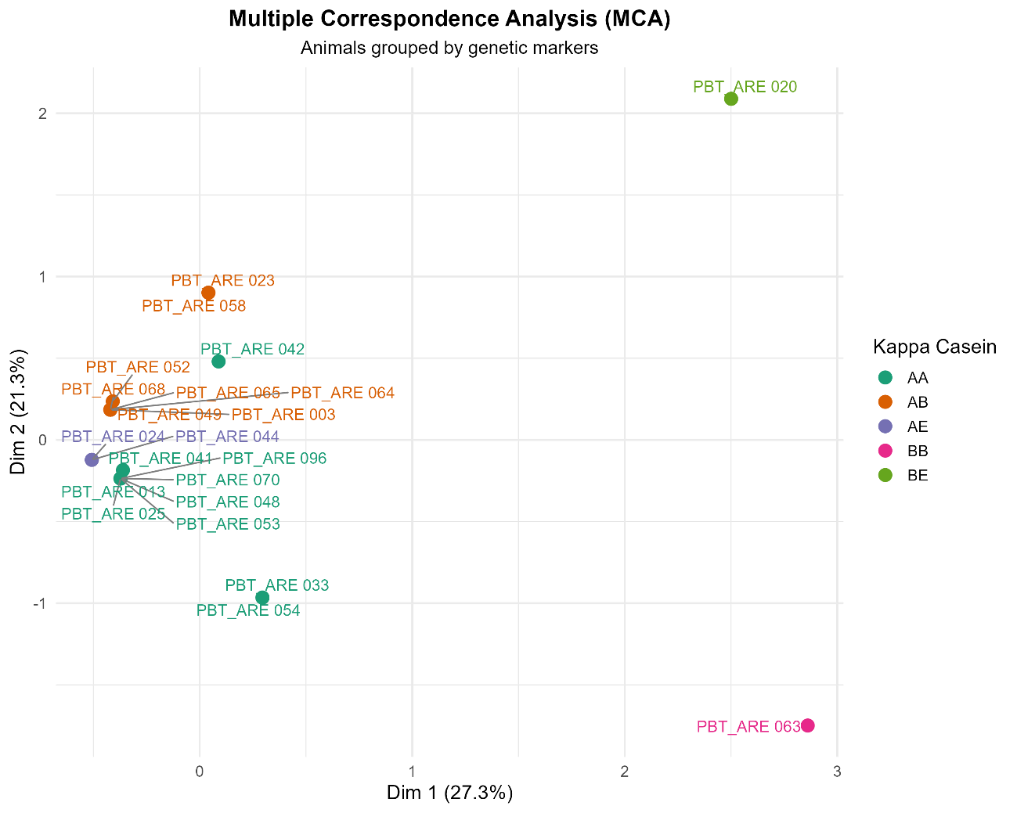
**

Supplementary Figure S3. Multiple Correspondence Analysis (MCA) of Genetic Profiles – Igenity Basic
